# Supplementary material for: A facile method for the synthesis of Co-core Au-shell nanohybrid
Source: Royal Society of Chemistry journal article supplement (doi:10.1039/c4nj00733f), 2014-01-01
Supplement: c4nj00733f1.pdf [file c4nj00733f1.pdf]

## A facile method for synthesis of Co-core Au-shell nanohybrid

Debasmita Sardar,<sup>a,b</sup> S. K. Neogi,<sup>b,c</sup> S. Bandyopadhyay,<sup>b,c</sup> Biswarup Satpati,<sup>d</sup> Ruchi Jain,<sup>e</sup>  
Chinnakonda S. Gopinath,<sup>e</sup> Tanushree Bala<sup>a,b</sup> \*

<sup>a</sup>Department of Chemistry, University of Calcutta, 92 A.P.C. Road, Kolkata: 700009, India

<sup>b</sup>CRNN, University of Calcutta, JD 2, Sector III, Salt Lake, Kolkata: 700098, India

<sup>c</sup>Department of Physics, University of Calcutta, 92 A.P.C. Road, Kolkata: 700009, India

<sup>d</sup>Surface Physics Division, Saha Institute of Nuclear Physics, 1/AF Bidhannagar, Kolkata-64, India

<sup>e</sup>Catalysis Division and Center of Excellence on Surface Science, CSIR – National Chemical Laboratory, Dr. Homi Bhabha Road, Pune -411 008, India

### Supporting Information SI-1

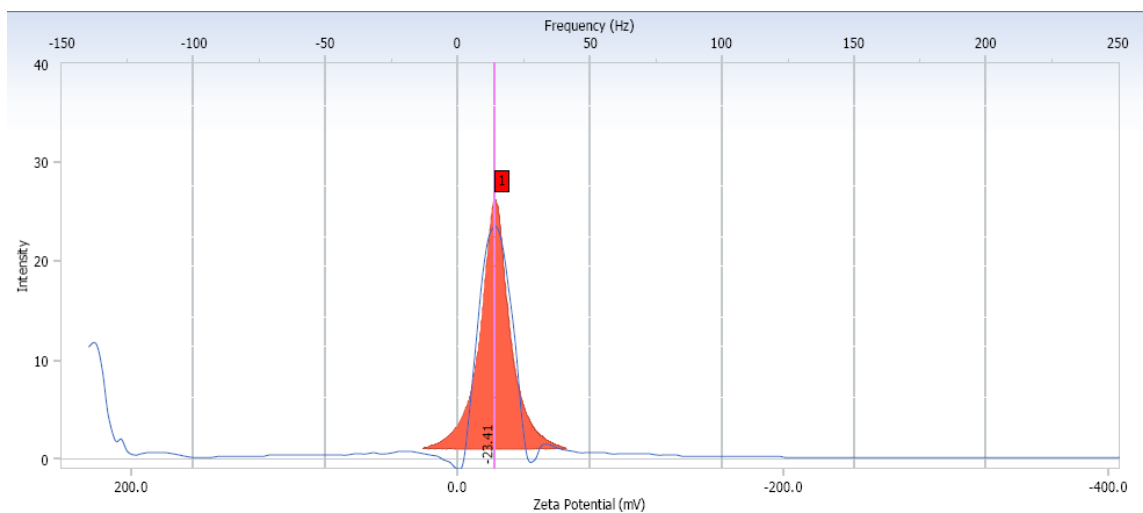

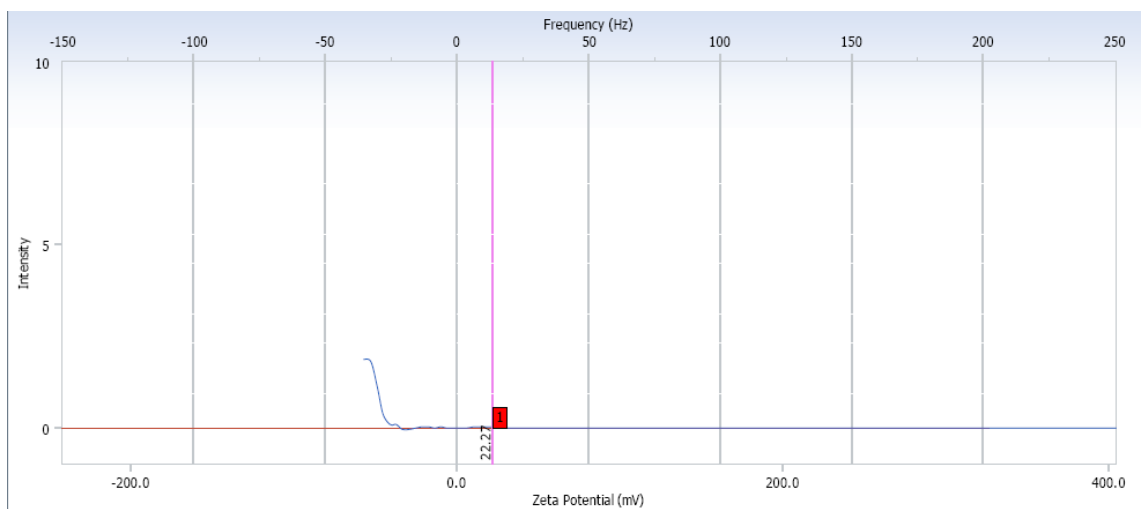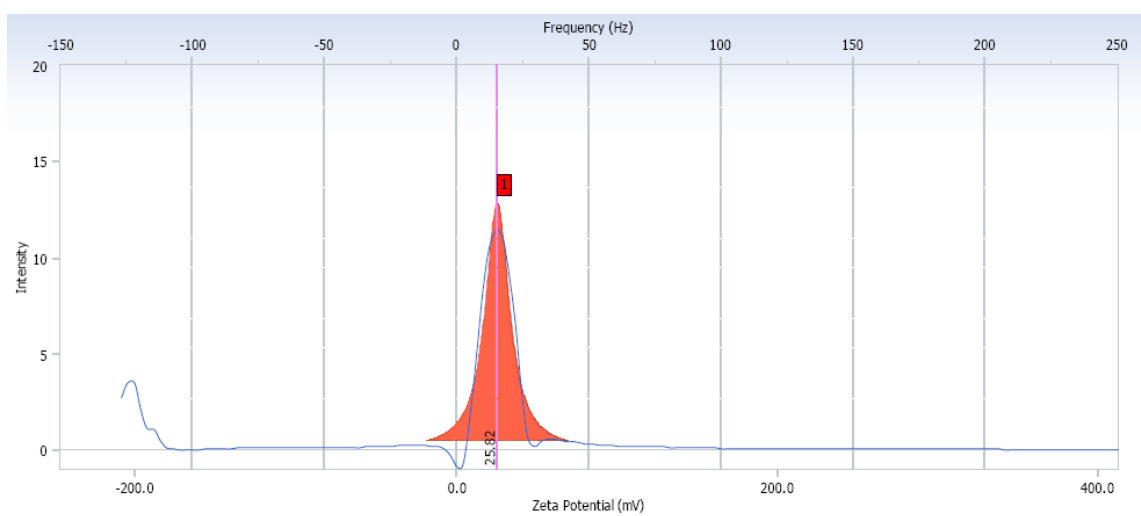

**Fig. SI-1:** Panel A: Raw data of Zeta potential of Co nanoparticles. Panel B: Zeta potential of Tryptophan modified Co nanoparticles. Panel C: Zeta potential of Co-Au nanoparticles.

## Supporting Information SI-2

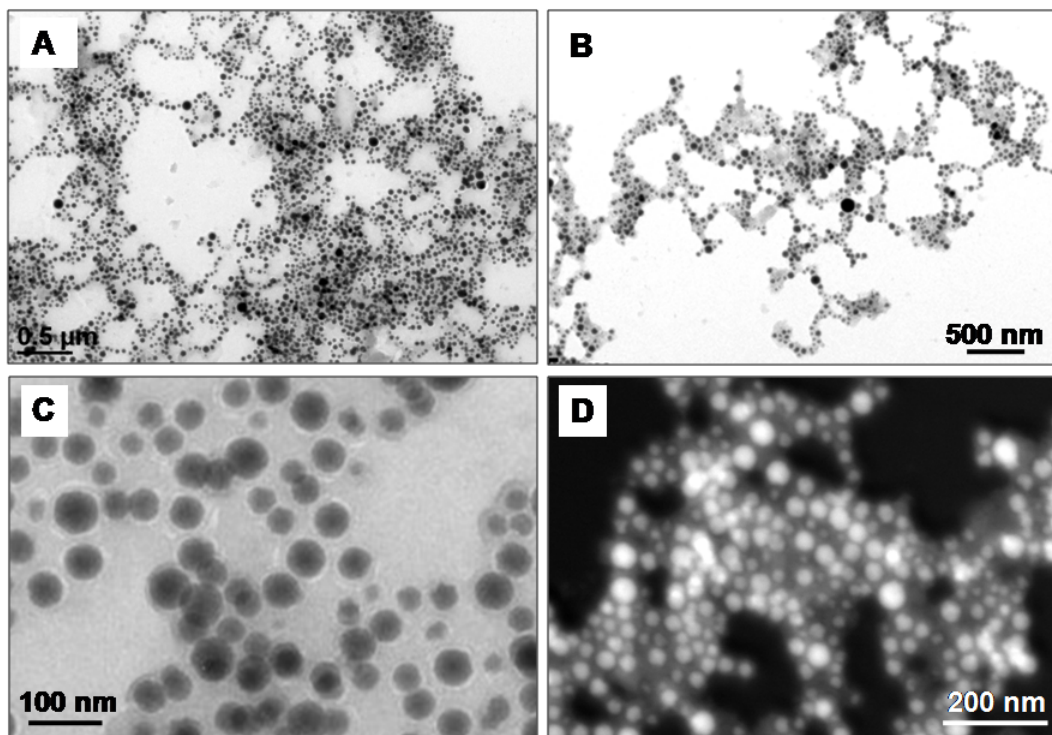

**Fig. SI-2:** TEM images of Co nanoparticles (A-C). STEM image of the same (D).

### Supporting Information SI-3

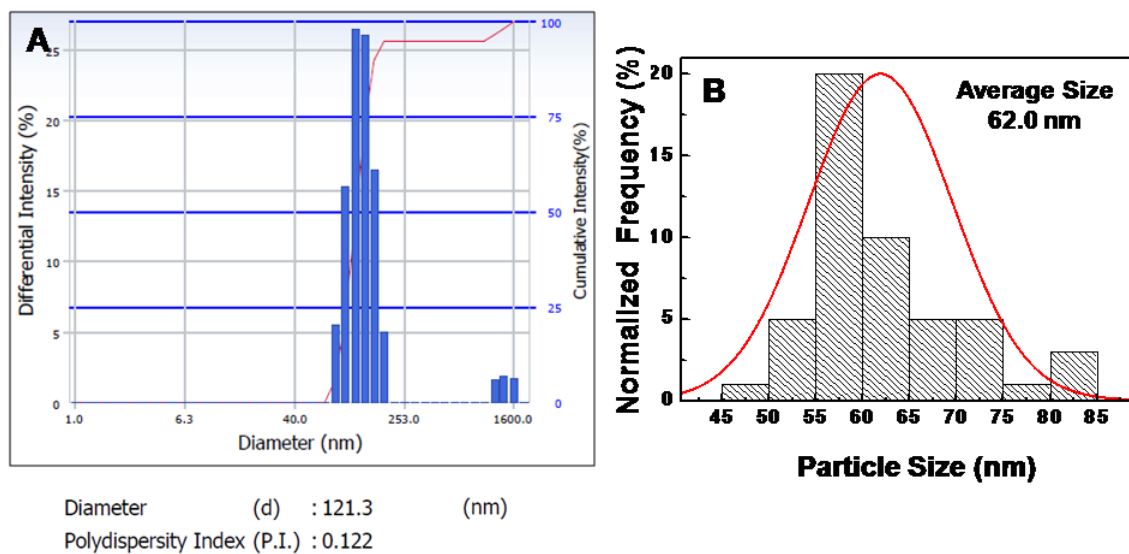

**Fig. SI-3:** The size distribution of as prepared Co nanoparticles, obtained from DLS measurements (A) and also from particle size analysis using TEM images (B).

## Supporting Information SI-4

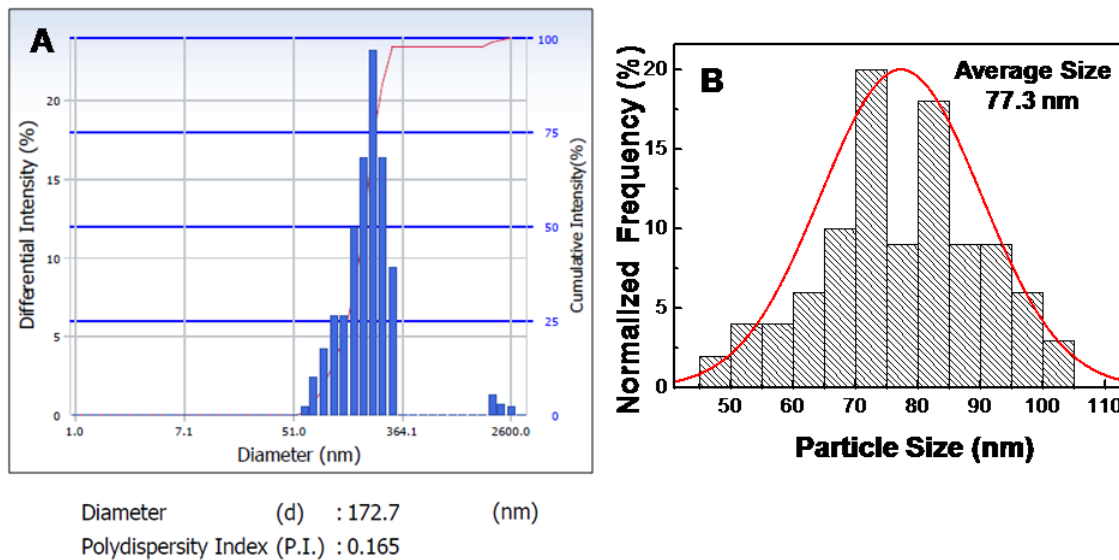

**Fig. SI-4:** The size distribution of Co-core Au-shell hybrid nanoparticles, obtained from DLS measurements (A) and also from particle size analysis using TEM images (B). The discrepancy in the average size as obtained by two different techniques (TEM and DLS) was obvious (Ref-1, SI-4). But in both cases we could find the increase in size after Au deposition as compared to pristine Co nanoparticles presented in Fig. SI-3.

### Reference:

1. S.P. Moulik, B.K. Paul Adv. Colloid and Interface Sci., 1998, 78, 99.
